1 Prevalence of overweight and its associated factors among Malaysian adults: findings from a  
2 nationally representative survey

3

4 Chong Chean Tat<sup>1\*</sup>, Lai Wai Kent<sup>1</sup>, Syafinaz Mohd Sallehuddin<sup>1</sup>, Shubash Shander Ganapathy<sup>1</sup>

5

6 <sup>1</sup>Institute for Public Health, National Institutes of Health, Ministry of Health Malaysia.

7

8 \*Corresponding author

9 E-mail: [chean@moh.gov.my](mailto:chean@moh.gov.my)

10

11

12

13

14

15

16

17

**NOTE: This preprint reports new research that has not been certified by peer review and should not be used to guide clinical practice.**

## 18 **Abstract**

19           The World Health Organization has reported that the prevalence of overweight is a  
20 growing problem in many countries, including middle- and lower-income countries like  
21 Malaysia. This study aimed to determine the prevalence of overweight and its associated  
22 factors among Malaysian adults. A total of 9782 Malaysian adults aged 18 and above were  
23 included in this study, representing states and federal territories from the National Health  
24 and Morbidity Survey 2019. Sociodemographic data (sex, locality, age, marital status,  
25 ethnicity, educational level, income level, and health literacy), non-communicable disease  
26 status (hypertension, diabetes, and hypercholesterolemia), and lifestyle behaviours (physical  
27 activity level, smoking status, and also fruit and vegetable consumption) were collected and  
28 analysed to identify factors associated with overweight. The study found that the prevalence  
29 of overweight among Malaysian adults was 50.1%. Multivariate analyses showed that several  
30 factors, including female gender, ages 30-59 years, being Malay, Indian or other Bumiputeras,  
31 being married, and having adequate health literacy, were significantly associated with an  
32 increased risk of overweight. Additionally, overweight individuals had a significantly higher  
33 risk of non-communicable diseases such as diabetes and hypertension. The study suggests  
34 that intervention programs should be implemented in an equitable and cost-effective manner  
35 to target these high-risk populations and address the burden of overweight in Malaysia.

36

37

38

39

## 40 Introduction

41 Body mass index (BMI) is a commonly utilized tool for evaluating the nutritional status  
42 of adults, and it is associated with a range of health risks [1-2]. According to the World Health  
43 Organization (WHO), more than 1.9 billion adults worldwide were classified as overweight in  
44 2016, with 650 million of them being considered obese [3]. The global prevalence of obesity  
45 has nearly tripled since 1975, affecting many countries, including those with low and  
46 moderate incomes [3]. In Malaysia, a nationwide survey conducted in 2019 revealed a rising  
47 trend in obesity prevalence, increasing from 15.1% in 2011, to 17.7% in 2015, and finally to  
48 19.9% in 2019 [4-6].

49 The increasing prevalence of overweight and obesity has been linked to the  
50 development of non-communicable diseases (NCDs), including stroke, cardiovascular disease,  
51 and diabetes [2]. This trend has resulted in a significant global health burden [7], contributing  
52 to higher rates of disability-adjusted life years (DALYs) and mortality [8]. Recent studies have  
53 also suggested that overweight and obesity may compromise the immune system, thereby  
54 increasing the risk of infectious diseases [9]. As such, addressing overweight and obesity and  
55 promoting healthy weight management strategies is crucial to reduce the health burden  
56 associated with NCDs and infectious diseases [10].

57 Despite the implementation of various recommendations and intervention programs  
58 aimed at preventing overweight and obesity, research has shown that achieving and  
59 maintaining weight reduction can be challenging [11]. Therefore, the aim of this study was to  
60 determine the prevalence of overweight among Malaysian adults and its associated factors.  
61 The findings of this study will provide crucial information for prioritizing and developing

62 precise planning guidelines to effectively combat the rising prevalence of overweight in  
63 Malaysia.

64

## 65 **Methods**

### 66 **Study design and sampling**

67 This study involved the secondary analysis of data collected from the National Health  
68 and Morbidity Survey (NHMS) 2019, which is a cross-sectional population-based survey  
69 conducted in Malaysia. The survey was conducted nationwide between July 14th and October  
70 2nd, 2019, with an achievement response rate of 87.2% [6]. The study population included all  
71 adults aged 18 years and above who had lived in non-institutional living quarters (LQs) for at  
72 least two weeks in all states and federal territories of Malaysia. Individuals living in  
73 institutional living quarters, such as hotels, hostels, hospitals, and others, were not included  
74 in this study.

75 A two-stage stratified random sampling technique was used in this study to achieve  
76 national representativeness. The main stratum included all states and federal territories,  
77 while the secondary stratum consisted of both urban and rural strata from the main stratum.  
78 The main sampling unit involved 475 Enumeration Blocks (EBs), comprising 362 EBs from  
79 urban areas and 113 EBs from rural areas. The secondary sampling unit involved a total of  
80 5,676 living quarters (LQs), comprising 4,320 LQs from urban areas and 1,356 LQs from rural  
81 areas within the selected EBs. The classification of urban and rural areas was defined by

82 Department of Statistics Malaysia. The full details of the research methods and sampling  
83 design used in this nationwide survey are available in the official report [6].

84

## 85 **Questionnaire**

86 The data collection process for this nationwide survey included face-to-face interviews  
87 and self-administered process using structured questionnaires programmed into application  
88 in tablet. For respondents who preferred paper-based questionnaires, they were also  
89 provided. Information on sociodemographic factors, non-communicable disease (NCD) status,  
90 and lifestyle behaviours were collected from respondents aged 18 and above and extracted  
91 from the survey database for analysis in this study.

92

## 93 **Dependent variable**

94 This study employed a standard protocol to measure body height and weight twice for  
95 each participant, with the final measurements calculated from the average of the two  
96 readings. Body height was determined using the SECA Stadiometer 213 (SECA GmbH & Co.  
97 KG, Germany) to the nearest 0.1 cm, while body weight was measured using the Tanita  
98 Personal Scale HD 319 (Tanita Corporation, Japan) to the nearest 0.1 kg. Prior to  
99 measurement, the devices were calibrated and participants were instructed to wear  
100 lightweight clothing, remove their shoes, and stand upright on the measuring equipment.  
101 Body mass index (BMI) was computed by dividing body weight in kilograms by the square of  
102 body height in meters ( $\text{kg}/\text{m}^2$ ), where BMI values of 25.0 - 29.9  $\text{kg}/\text{m}^2$  and  $\geq 30 \text{ kg}/\text{m}^2$  were  
103 used to define overweight and obesity, respectively [12]. For the present analysis, only adults

104 with a BMI  $\geq$  25.0 kg/m<sup>2</sup> (inclusive of obesity) were included to examine the independent  
105 determinants of overweight.

106

## 107 **Independent variables**

108 The study obtained sociodemographic data including sex, locality, age, marital status,  
109 ethnicity, educational level, income level, and health literacy, as well as NCD status  
110 (hypertension, diabetes, and hypercholesterolemia) and lifestyle behaviours (physical activity  
111 level, smoking status, and fruit and vegetable consumption) from the respondents. These  
112 data were analysed to determine the factors associated with overweight.

113 This study collected various sociodemographic data from the respondents. Age was  
114 categorized into three groups: 18 to 29 years, 30 to 59 years, and 60 years and above.  
115 Ethnicity was classified into five categories: Malays, Chinese, Indians, other Bumiputeras  
116 (Sabah and Sarawak), and others. Respondents' income was grouped into four categories: <  
117 RM 1000, RM 1000 - 1999, RM 2000 - 2999, and  $\geq$  RM 3000. Working status was classified  
118 into two categories: working and not working. Educational level was categorized as no formal  
119 education, primary education (completion of Standard Six), secondary school (completion of  
120 Form Five), and tertiary education (completion of Form Six, obtained certificate, diploma or  
121 any other academic degree). Marital status was divided into three groups: single, married,  
122 and other (divorced, and widow or widower). The respondents' health literacy was assessed  
123 using the HLS-M-Q18, an adapted version of HLS-EU-Q47[13], where a score of 0 to 33 was  
124 classified as limited health literacy, and a score above 33 was classified as adequate health  
125 literacy.

126           The NCD status of the respondents was evaluated by determining the presence of  
127 diabetes, hypertension, and hypercholesterolemia through either self-reported diagnosis by  
128 healthcare professionals or clinical measurement using appropriate devices. The CardioChek  
129 portable blood test device was used to obtain finger-prick blood glucose (BG) and total  
130 cholesterol (TC) levels, with fasting capillary BG  $\geq 7.0$  mmol/L and/or non-fasting capillary BG  
131  $\geq 11.1$  mmol/L indicating diabetes [14], and TC levels  $\geq 5.2$  mmol/L indicating  
132 hypercholesterolemia [15]. Blood pressure (BP) was measured using the HEM-907 BP Monitor  
133 (Kyoto, Japan), with systolic BP  $\geq 140$  mm Hg and/or diastolic BP  $\geq 90$  mm Hg indicating  
134 hypertension.

135           This study utilized validated questionnaires to determine smoking status and level of  
136 physical activity. The Global Adult Tobacco Surveillance (GATS) [17] questionnaire was used  
137 to identify current smoking status, while the short version of the International Physical  
138 Activity Questionnaire (IPAQ) [18] was used to assess the level of physical activity. The  
139 respondents' fruit and vegetable consumption were also collected and was considered  
140 adequate if they consumed a minimum of five servings daily, and inadequate if they  
141 consumed less than five servings daily. Criteria for active physical activity level were defined  
142 as a minimum of 20 minutes per day of three vigorous activities, or a minimum of 30 minutes  
143 per day of five days of moderate-intensity activity or walking, or a minimum of 600 MET-  
144 minutes per week of a combination of walking, moderate-intensity, or vigorous-intensity  
145 activities for at least five days, or a minimum of 1500 MET-minutes per week of three days of  
146 vigorous-intensity activity, or a minimum of 3000 MET-minutes per week of a combination of  
147 walking, moderate-intensity, or vigorous-intensity activities for at least seven days.

148

## 149 **Statistical analysis**

150 Statistical analysis was performed using IBM SPSS Statistics (version 28, Chicago,  
151 Illinois, USA). Descriptive statistics were used to summarize the data, and the Pearson's  $\chi^2$  test  
152 was used to evaluate differences between BMI categories and independent variables. A  
153 multiple logistic regression model was employed to identify the factors associated with  
154 overweight, while controlling for potential confounders. All variables with a P-value less than  
155 .25 were included in the final model, with an adjusted odds ratio (AOR) obtained for each  
156 variable. A P-value less than .25 was considered sufficient for controlling residual confounding  
157 [19]. Both crude odds ratio (COR) and AOR were presented with 95% confidence intervals (CI),  
158 and P-values less than .05 were considered statistically significant.

159

## 160 **Ethical approval**

161 This study obtained ethical approval from the Medical Research and Ethics Committee  
162 (MREC), Ministry of Health Malaysia. It was registered under the National Medical Research  
163 Registry (NMRR) with number NMRR-18-3085-44207. All participants provided written  
164 informed consent prior to interviews during the NHMS's 2019 data collection.

165

## 166 **Results**

167 The study involved a total of 9782 respondents, predominantly comprising Malays  
168 (51.3%), followed by Chinese (20.7%), other Bumiputeras (11.3%), other ethnic groups  
169 (10.9%), and Indians (5.9%). The male respondents (52.4%) slightly outnumbered the females



170 (47.6%), with the majority of the participants being married (63.9%) and aged between 30  
 171 and 59 years (54.1%). Nearly half of the respondents had completed secondary education  
 172 (49.6%) and had an income level of RM3000 or more (53.4%). The majority of respondents  
 173 resided in urban areas (77.9%) and were employed, with adequate health literacy. Among the  
 174 respondents, 18.3% had diabetes, 30.1% had hypertension, and 39.0% had  
 175 hypercholesterolemia. Regarding lifestyle behaviours, most of the respondents were  
 176 physically active (77.1%), non-smokers (76.8%), and did not consume the recommended daily  
 177 servings of fruits and vegetables (94.7%).

178

179 **Table 1: Prevalence of overweight among adults Malaysian**

| Variable              | Prevalence            |                   | P value*        |
|-----------------------|-----------------------|-------------------|-----------------|
|                       | Non-overweight, n (%) | Overweight, n (%) |                 |
| Overall               | 4389 (49.9)           | 5393 (50.1)       |                 |
| Sociodemographic Data |                       |                   |                 |
| Sex                   |                       |                   | <b>&lt;.001</b> |
| - Male                | 2223 (54.1)           | 2308 (45.9)       |                 |
| - Female              | 2166 (45.3)           | 3085 (54.7)       |                 |
| Age                   |                       |                   | <b>&lt;.001</b> |
| - 18 – 29             | 1253 (62.7)           | 854 (37.3)        |                 |
| - 30 – 59             | 2084 (42.1)           | 3416 (57.9)       |                 |
| - ≥ 60                | 1052 (50.8)           | 1123 (49.2)       |                 |
| Locality              |                       |                   | 0.704           |
| - Rural               | 1704 (50.5)           | 2105 (49.5)       |                 |
| - Urban               | 2685 (49.7)           | 3288 (50.3)       |                 |
| Ethnicity             |                       |                   | <b>&lt;.001</b> |
| - Malays              | 2728 (46.4)           | 3577 (53.6)       |                 |
| - Chinese             | 665 (59.7)            | 540 (40.3)        |                 |
| - Indians             | 228 (36.3)            | 395 (63.7)        |                 |
| - Other Bumiputeras   | 460 (44.8)            | 594 (55.2)        |                 |
| - Others              | 308 (60.4)            | 287 (39.6)        |                 |
| Educational Level     |                       |                   | 0.184           |
| - No Formal Education | 285 (56.8)            | 271 (43.2)        |                 |
| - Primary Education   | 974 (51.1)            | 1211 (48.9)       |                 |

|                          |             |             |                 |
|--------------------------|-------------|-------------|-----------------|
| - Secondary Education    | 2073 (48.7) | 2642 (51.3) |                 |
| - Tertiary Education     | 1046 (49.9) | 1260 (50.1) |                 |
| Marital Status           |             |             | <b>&lt;.001</b> |
| - Single                 | 1209 (61.2) | 881 (38.8)  |                 |
| - Married                | 2733 (44.9) | 3948 (55.1) |                 |
| - Others                 | 447 (47.9)  | 564 (52.1)  |                 |
| Working Status           |             |             | 0.095           |
| - Working                | 2615 (50.9) | 3147 (49.1) |                 |
| - Not Working            | 1774 (48.1) | 2246 (51.9) |                 |
| Income Level             |             |             | 0.451           |
| - Less than RM 1000      | 480 (53.6)  | 477 (46.4)  |                 |
| - RM 1000 – RM 1999      | 902 (51.7)  | 1068 (48.3) |                 |
| - RM 2000 – RM 2999      | 706 (49.9)  | 930 (50.1)  |                 |
| - RM 3000 & above        | 2062 (49.2) | 2597 (50.8) |                 |
| Health Literacy          |             |             | <b>0.001</b>    |
| - Limited                | 1511 (54.1) | 1638 (45.9) |                 |
| - Adequate               | 2491 (47.7) | 3300 (52.3) |                 |
| NCD Status               |             |             |                 |
| Diabetes                 |             |             | <b>&lt;.001</b> |
| - No                     | 3586 (53.1) | 3762 (46.9) |                 |
| - Yes                    | 803 (35.8)  | 1628 (64.2) |                 |
| Hypertension             |             |             | <b>&lt;.001</b> |
| - No                     | 3159 (57.0) | 2847 (43.0) |                 |
| - Yes                    | 1229 (33.5) | 2543 (66.5) |                 |
| Hypercholesterolemia     |             |             | <b>&lt;.001</b> |
| - No                     | 2616 (55.2) | 2608 (44.8) |                 |
| - Yes                    | 1773 (41.5) | 2785 (58.5) |                 |
| Lifestyle Behaviour      |             |             |                 |
| Smoking Status           |             |             | <b>&lt;.001</b> |
| - No                     | 3329 (48.1) | 4472 (51.9) |                 |
| - Yes                    | 1043 (55.8) | 905 (44.2)  |                 |
| Physical Activity        |             |             | <b>.043</b>     |
| - Inactive               | 1070 (52.7) | 1214 (47.3) |                 |
| - Active                 | 3274 (49.2) | 4127 (50.8) |                 |
| Fruit & Vegetable Intake |             |             | .225            |
| - Inadequate             | 3573 (49.0) | 4506 (51.0) |                 |
| - Adequate               | 153 (54.7)  | 202 (45.3)  |                 |

180 \*P values of less than .05 were considered significant.

181

182 In the present study, the prevalence of overweight among adults in Malaysia was  
 183 reported to be 50.1%. The prevalence of overweight was significantly higher among females  
 184 (compared to males;  $p < 0.001$ ); aged 30 to 59 years old (compared to other age group;  $p <$   
 185  $0.001$ ); being Indians (compared to other ethnicities;  $p < 0.001$ ); married (compared to other  
 186 marital status;  $p < 0.001$ ); adequate health literacy level (compared to limited health literacy  
 187 level;  $p < 0.001$ ); diagnosed with diabetes (compared to non-diabetes;  $p < 0.001$ );  
 188 hypertension (compared to non-hypertensive group;  $p < 0.001$ ); high cholesterol level  
 189 (compared to normal cholesterol level;  $p < 0.001$ ); non-smoker (compared to smoker;  $p <$   
 190  $0.001$ ); and those who were physically active (compared to physically inactive;  $p = 0.043$ ).  
 191 Details for the prevalence of overweight and variables were shown in Table 1.

192

193 **Table 2: Factors associated with overweight among adults Malaysians**

| Variable                     | COR [95% CI]     | P value <sup>a</sup> | AOR [95% CI]*    | P value <sup>b</sup> |
|------------------------------|------------------|----------------------|------------------|----------------------|
| <b>Sociodemographic Data</b> |                  |                      |                  |                      |
| <b>Sex</b>                   |                  |                      |                  |                      |
| - Male                       | Ref              |                      | Ref              |                      |
| - Female                     | 1.42 (1.26,1.61) | <.001                | 1.33 (1.11,1.58) | <b>.002</b>          |
| <b>Age</b>                   |                  |                      |                  |                      |
| - 18 – 29                    | Ref              |                      | Ref              |                      |
| - 30 – 59                    | 2.31 (1.98,2.70) | <.001                | 1.61 (1.31,1.97) | <b>&lt;.001</b>      |
| - $\geq 60$                  | 1.63 (1.34,1.98) | <.001                | 0.75 (0.54,1.04) | .088                 |
| <b>Ethnicity</b>             |                  |                      |                  |                      |
| - Malays                     | 1.71 (1.39,2.11) | <.001                | 1.68 (1.36,2.07) | <b>&lt;.001</b>      |
| - Indians                    | 2.60 (1.84,3.67) | <.001                | 2.59 (1.80,3.74) | <b>&lt;.001</b>      |
| - Other Bumiputras           | 1.83 (1.40,2.38) | <.001                | 1.82 (1.38,2.39) | <b>&lt;.001</b>      |
| - Others                     | 0.97 (0.69,1.35) | .852                 | 1.15 (0.81,1.62) | .434                 |
| - Chinese                    | Ref              |                      | Ref              |                      |
| <b>Marital Status</b>        |                  |                      |                  |                      |
| - Single                     | Ref              |                      | Ref              |                      |
| - Married                    | 1.93 (1.67,2.23) | <.001                | 1.23 (1.00,1.50) | <b>.046</b>          |
| - Others                     | 1.72 (1.38,2.13) | <.001                | 0.92 (0.67,1.25) | .581                 |
| <b>Health Literacy</b>       |                  |                      |                  |                      |

|                      |                  |       |                  |                 |
|----------------------|------------------|-------|------------------|-----------------|
| - Limited            | Ref              |       | Ref              |                 |
| - Adequate           | 1.29 (1.11,1.51) | .001  | 1.19 (1.01,1.39) | <b>.033</b>     |
| NCD Status           |                  |       |                  |                 |
| Diabetes             |                  |       |                  |                 |
| - No                 | Ref              |       | Ref              |                 |
| - Yes                | 2.03 (1.73,2.73) | <.001 | 1.47 (1.23,1.75) | <b>&lt;.001</b> |
| Hypertension         |                  |       |                  |                 |
| - No                 | Ref              |       | Ref              |                 |
| - Yes                | 2.63 (2.30,3.01) | <.001 | 2.60 (2.20,3.07) | <b>&lt;.001</b> |
| Hypercholesterolemia |                  |       |                  |                 |
| - No                 | Ref              |       | Ref              |                 |
| - Yes                | 1.74 (1.52,2.00) | <.001 | 1.16 (0.99,1.35) | .062            |
| Lifestyle Behaviour  |                  |       |                  |                 |
| Smoking Status       |                  |       |                  |                 |
| - No                 | Ref              |       | Ref              |                 |
| - Yes                | 0.74 (0.63,0.87) | <.001 | 0.85 (0.70,1.05) | .125            |
| Physical Activity    |                  |       |                  |                 |
| - Inactive           | 0.87 (0.76,0.99) | .043  | 0.89 (0.77,1.03) | .120            |
| - Active             | Ref              |       | Ref              |                 |

194 Abbreviations: CI, Confidence Interval; COR, Crude Odds Ratio; AOR, Adjusted Odds Ratio.

195 <sup>a</sup>P value of less than .25 were included in the final model.

196 <sup>b</sup>P values of less than .05 were considered significant.

197 \*Multiple logistic regression was applied. The final model was adjusted for sex, age, ethnicity,  
 198 marital status, health literacy, diabetes, hypertension, hypercholesterolemia, smoking status,  
 199 and physical activity.

200

201 Multiple logistic regression analysis was conducted to identify the independent factors  
 202 associated with overweight among Malaysian adults. The findings, presented in Table 2,  
 203 reveal that being females (AOR: 1.33, 95%CI: 1.11, 1.58) increases the likelihood of  
 204 overweight. Similarly, adults aged 30 to 59 years old (AOR: 1.61; 95%CI: 1.31, 1.97) are at  
 205 higher risk of being overweight compared to those aged 18 to 29 years old. Ethnicity also plays

206 a role, with Malays (AOR: 1.68, 95%CI: 1.36, 2.07), Indians (AOR: 2.59, 95%CI: 1.80, 3.74), and  
207 other Bumiputeras (AOR: 1.82, 95%CI: 1.38,2.39) having a significantly higher risk of  
208 overweight than Chinese. Married individuals (AOR: 1.23; 95%CI: 1.00, 1.50) were also found  
209 to be more likely to be overweight compared to single individuals. Surprisingly, adults with  
210 adequate health literacy (AOR: 1.19; 95%CI: 1.01, 1.39) were also at a higher risk of  
211 overweight compared to those with limited health literacy. The study also revealed that  
212 respondents with hypertension (AOR: 2.60; 95%CI: 2.20, 3.07) and diabetes (AOR: 1.47; 95%CI:  
213 1.23, 1.75) had a higher likelihood of being overweight than respondents without these  
214 conditions. However, no significant association was found between cholesterol level and  
215 overweight. Finally, there was no significant association reported between lifestyle  
216 behaviours, such as physical activity and smoking status, and overweight among adults in  
217 Malaysia.

218

## 219 Discussion

220 This study aimed to identify the prevalence and factors associated with overweight  
221 among adults in Malaysia from a national representative study. The results showed that 50.1%  
222 of Malaysian adults had overweight, which is an increase from previous national surveys  
223 conducted in 2011 [4] and 2015 [5], where the rates were 44.5% and 47.7%, respectively. This  
224 suggests that there has been a notable increase in the prevalence of overweight among  
225 Malaysian adults. Furthermore, the prevalence of overweight in Malaysia was higher than  
226 that observed in southern China [20], and most Southeast Asian countries [21-27], except for  
227 Brunei [28], but lower than the rates reported in the United States [29]. This finding is  
228 concerning, as it indicates that a significant proportion of Malaysian adults are overweight.

229           Multivariable logistic regression analysis was conducted to examine the independent  
230 determinants associated with overweight risk, after adjusting for potential confounding  
231 variables. Females had a significantly higher risk of overweight compared to males, which is  
232 consistent with the global trend [30-31]. The adverse impacts of female obesity on  
233 reproductive health have been well-established [32-33]. Additionally, adults aged 30-39, 40-  
234 49, and 50-59 years old were significantly more likely to be overweight compared to those  
235 aged 18-29 years old, while there was no significant association for those aged 60 years old  
236 and above. This finding is consistent with previous studies conducted in other countries  
237 [24,26,34]. The increased financial independence, easy access to food, and availability of  
238 calorie-dense food in lower- and middle-income countries may contribute to the higher  
239 prevalence of overweight among adults [35].

240           The present study conducted a comparison of the ethnicity of adults, revealing a  
241 higher risk of overweight among Malays, Indians, and other Bumiputeras in contrast to  
242 Chinese. This finding was consistent with previous national population surveys [36] and a  
243 study conducted in Singapore [37]. The observed differences in dietary patterns across ethnic  
244 groups might explain this trend [38]. Additionally, the study found that married individuals  
245 were more likely to be overweight and obese compared to single people, a finding consistent  
246 with other studies [21,23,26,39]. The hypothesis is that having an obese spouse increases the  
247 likelihood of becoming obese due to comparable lifestyle behaviors [40]. Interestingly, the  
248 study found that individuals with adequate health literacy were associated with a higher risk  
249 of overweight compared to those with limited health literacy. This finding is different from  
250 other studies [41-42], although one study did not find an association between health literacy  
251 and overweight [43]. Despite this finding, health literacy remains crucial in weight  
252 management [41-42].

253           Also, the present study found that the higher risk of overweight was significantly  
254 associated with an increased likelihood of NCD, such as diabetes and hypertension. This  
255 finding is consistent with a pooled analysis of 1.8 million people from 97 prospective cohorts  
256 and approximately half of the risk of cardiovascular disease and three-quarters of the risk of  
257 stroke related to BMI were due to NCD [44]. Therefore, proper planning and effective  
258 strategies are crucial to intervene and address the burden of disease related to overweight  
259 [44-47].

260           This study had several strengths, including the use of a large nationally representative  
261 population, which allowed for valid inferences to be made regarding Malaysian adults.  
262 Additionally, the use of validated and standardized instruments during data collection  
263 decreased the likelihood of measurement inaccuracies. However, there were some  
264 limitations to this study, including its cross-sectional design, which prevented causal  
265 relationships to be established between exposure risk and disease outcomes. Furthermore,  
266 the inadequate dietary data collected in this study may have made it difficult to substantiate  
267 the association between food consumption and overweight among the population.  
268 Longitudinal studies are needed to further investigate the causal relationship between risk  
269 factors and overweight, as well as to evaluate the effectiveness of interventions to reduce the  
270 burden of overweight in Malaysia.

271

## 272 **Conclusion**

273           The present study findings indicate that a high prevalence of overweight exists among  
274 adults in Malaysia, affecting approximately half of the population. The likelihood of being

275 overweight and obese was associated with various factors, such as female gender, aged 30 to  
276 59 years, being of Malay, Indian or other Bumiputera ethnicity, being married, and having  
277 adequate health literacy. Additionally, adults diagnosed with NCD (hypertension and diabetes)  
278 were more likely to be overweight. To effectively address the burden of overweight, public  
279 health nutrition interventions in Malaysia should focus on these high-risk populations using a  
280 cost-effective and equitable approach.

281

## 282 **Acknowledgement**

283 The authors would like to thank the Director General of Health Malaysia for his  
284 permission to publish this paper. We would also like to thank all research team members and  
285 data collectors for their contributions and commitment in this study. We appreciate the  
286 funding and support from the Ministry of Health Malaysia. We are also grateful for the kind  
287 cooperation of all participants.

288

## 289 **References**

- 290 1. Ng M, Fleming T, Robinson M, Thomson B, Graetz N, Margono C, et al. Global, regional,  
291 and national prevalence of overweight and obesity in children and adults during 1980-  
292 2013: a systematic analysis for the Global Burden of Disease Study 2013. *Lancet*. 2014  
293 Aug 30;384(9945):766-81. doi: 10.1016/S0140-6736(14)60460-8. Epub 2014 May 29.  
294 Erratum in: *Lancet*. 2014 Aug 30;384(9945):746. PMID: 24880830; PMCID:  
295 PMC4624264.



- 296 2. The Lancet Gastroenterology Hepatology. Obesity: another ongoing pandemic. Lancet  
297 Gastroenterol Hepatol. 2021 Jun;6(6):411. doi: 10.1016/S2468-1253(21)00143-6.  
298 PMID: 34015350; PMCID: PMC9259282.
- 299 3. Institute for Public Health. National Health and Morbidity Survey 2011 (NHMS 2011).  
300 Vol II: Non-Communicable Diseases. Kuala Lumpur: Ministry of Health Malaysia; 2011.
- 301 4. Institute for Public Health. National Health and Morbidity Survey 2015 (NHMS 2015).  
302 Vol II: Non-Communicable Diseases, Risk Factors & Other Health Problems. Kuala  
303 Lumpur: Ministry of Health Malaysia; 2015.
- 304 5. Institute for Public Health. National Health and Morbidity Survey (NHMS) 2019: Vol I:  
305 NCDs – Non-Communicable Diseases: Risk Factors and other Health Problems.  
306 Ministry of Health Malaysia; 2020.
- 307 6. Lin X, Xu Y, Xu J, Pan X, Song X, Shan L, et al. Global burden of noncommunicable  
308 disease attributable to high body mass index in 195 countries and territories, 1990-  
309 2017. Endocrine. 2020 Aug;69(2):310-320. doi: 10.1007/s12020-020-02352-y. Epub  
310 2020 Jun 2. PMID: 32488838.
- 311 7. GBD 2015 Obesity Collaborators. Health Effects of Overweight and Obesity in 195  
312 Countries over 25 Years. N Engl J Med. 2017 Jul 6;377(1):13-27. doi:  
313 10.1056/NEJMoa1614362. Epub 2017 Jun 12. PMID: 28604169; PMCID: PMC5477817.
- 314 8. Dai H, Alsalhe TA, Chalghaf N, Riccò M, Bragazzi NL, Wu J. The global burden of disease  
315 attributable to high body mass index in 195 countries and territories, 1990-2017: An  
316 analysis of the Global Burden of Disease Study. PLoS Med. 2020 Jul 28;17(7):e1003198.  
317 doi: 10.1371/journal.pmed.1003198. PMID: 32722671; PMCID: PMC7386577.

- 318 9. Francisco V, Pino J, Campos-Cabaleiro V, Ruiz-Fernández C, Mera A, Gonzalez-Gay MA,  
319 et al. Obesity, Fat Mass and Immune System: Role for Leptin. *Front Physiol.* 2018 Jun  
320 1;9:640. doi: 10.3389/fphys.2018.00640. PMID: 29910742; PMCID: PMC5992476.
- 321 10. The Lancet Gastroenterology Hepatology. Obesity: another ongoing pandemic. *Lancet*  
322 *Gastroenterol Hepatol.* 2021 Jun;6(6):411. doi: 10.1016/S2468-1253(21)00143-6.  
323 PMID: 34015350; PMCID: PMC9259282.
- 324 11. Lim KG. A Review of Adult Obesity Research in Malaysia. *Med J Malaysia.* 2016  
325 Jun;71(Suppl 1):1-19. PMID: 27801384.
- 326 12. WHO Expert Consultation. Appropriate body-mass index for Asian populations and its  
327 implications for policy and intervention strategies. *Lancet.* 2004 Jan  
328 10;363(9403):157-63. doi: 10.1016/S0140-6736(03)15268-3. Erratum in: *Lancet.* 2004  
329 Mar 13;363(9412):902. PMID: 14726171.
- 330 13. Mohamad EMW, Kaundan MK, Hamzah MR, Azlan AA, Ayub SH, Tham JS, et al.  
331 Establishing the HLS-M-Q18 short version of the European health literacy survey  
332 questionnaire for the Malaysian context. *BMC Public Health.* 2020 Apr 28;20(1):580.  
333 doi: 10.1186/s12889-020-08704-7. PMID: 32345285; PMCID: PMC7189540.
- 334 14. Petersmann A, Müller-Wieland D, Müller UA, Landgraf R, Nauck M, Freckmann G, et  
335 al. Definition, Classification and Diagnosis of Diabetes Mellitus. *Exp Clin Endocrinol*  
336 *Diabetes.* 2019 Dec;127(S 01):S1-S7. doi: 10.1055/a-1018-9078. Epub 2019 Dec 20.  
337 PMID: 31860923.
- 338 15. National Cholesterol Education Program (NCEP) Expert Panel on Detection, Evaluation,  
339 and Treatment of High Blood Cholesterol in Adults (Adult Treatment Panel III). Third  
340 Report of the National Cholesterol Education Program (NCEP) Expert Panel on  
341 Detection, Evaluation, and Treatment of High Blood Cholesterol in Adults (Adult

- 342 Treatment Panel III) final report. *Circulation*. 2002 Dec 17;106(25):3143-421. PMID:  
343 12485966.
- 344 16. Working Group on Hypertension CPG. *Clinical Practice Guidelines—Management of*  
345 *Hypertension*. 5th ed. Putrajaya: Ministry of Health, Malaysia; 2018.
- 346 17. Global Adult Tobacco Survey Collaborative Group. *Global Adults Tobacco Survey*.  
347 Published 2020. Accessed December 15, 2022. Available from:  
348 [https://cdn.who.int/media/docs/default-source/ncds/ncd-](https://cdn.who.int/media/docs/default-source/ncds/ncd-surveillance/gats/18_gats_analysispackage_final_23nov2020.pdf?sfvrsn=67e2065f_)  
349 [surveillance/gats/18\\_gats\\_analysispackage\\_final\\_23nov2020.pdf?sfvrsn=67e2065f\\_](https://cdn.who.int/media/docs/default-source/ncds/ncd-surveillance/gats/18_gats_analysispackage_final_23nov2020.pdf?sfvrsn=67e2065f_)  
350 3.
- 351 18. International Physical Activity Questionnaire. Published 2005. Accessed December 15,  
352 2022. Available from: <http://www.ipaq.ki.se>.
- 353 19. Bursac Z, Gauss CH, Williams DK, Hosmer DW. Purposeful selection of variables in  
354 logistic regression. *Source Code Biol Med*. 2008 Dec 16;3:17. doi: 10.1186/1751-0473-  
355 3-17. PMID: 19087314; PMCID: PMC2633005.
- 356 20. Hu L, Huang X, You C, Li J, Hong K, Li P, Wu Y, et al. Prevalence of overweight, obesity,  
357 abdominal obesity and obesity-related risk factors in southern China. *PLoS One*. 2017  
358 Sep 14;12(9):e0183934. doi: 10.1371/journal.pone.0183934. PMID: 28910301; PMCID:  
359 PMC5598943.
- 360 21. de Juras AR, Hsu WC, Hu SC. Prevalence and Determinants of the Co-Occurrence of  
361 Overweight or Obesity and Micronutrient Deficiencies among Adults in the Philippines:  
362 Results from a National Representative Survey. *Nutrients*. 2021 Jul 8;13(7):2339. doi:  
363 10.3390/nu13072339. PMID: 34371849; PMCID: PMC8308505.
- 364 22. Nazeha N, Sathish T, Soljak M, Dunleavy G, Visvalingam N, Divakar U, Bajpai RC, Soh  
365 CK, Christopoulos G, Car J. A Comparative Study of International and Asian Criteria for

- 366 Overweight or Obesity at Workplaces in Singapore. *Asia Pac J Public Health*. 2021  
367 May;33(4):404-410. doi: 10.1177/1010539521998855. Epub 2021 Mar 14. PMID:  
368 33715451.
- 369 23. Papageorghiou AT, Deruelle P, Gunier RB, Rauch S, García-May PK, Mhatre M, et al.  
370 Preeclampsia and COVID-19: results from the INTERCOVID prospective longitudinal  
371 study. *Am J Obstet Gynecol*. 2021 Sep;225(3):289.e1-289.e17. doi:  
372 10.1016/j.ajog.2021.05.014. Epub 2021 Jun 26. PMID: 34187688; PMCID:  
373 PMC8233533.
- 374 24. Pengpid S, Vonglokham M, Kounnavong S, Sychareun V, Peltzer K. The prevalence of  
375 underweight and overweight/obesity and its correlates among adults in Laos: a cross-  
376 sectional national population-based survey, 2013. *Eat Weight Disord*. 2020  
377 Apr;25(2):265-273. doi: 10.1007/s40519-018-0571-5. Epub 2018 Sep 17. PMID:  
378 30225825.
- 379 25. Sakboonyarat B, Pornpongsawad C, Sangkool T, Phanmanas C, Kesonphaet N,  
380 Tangthongtawi N, et al. Trends, prevalence and associated factors of obesity among  
381 adults in a rural community in Thailand: serial cross-sectional surveys, 2012 and 2018.  
382 *BMC Public Health*. 2020 Jun 3;20(1):850. doi: 10.1186/s12889-020-09004-w. PMID:  
383 32493314; PMCID: PMC7271557.
- 384 26. Chakraborty PA, Talukder A, Haider SS, Gupta RD. Prevalence and factors associated  
385 with underweight, overweight and obesity among 15-49-year-old men and women in  
386 Timor-Leste. *PLoS One*. 2022 Feb 10;17(2):e0262999. doi:  
387 10.1371/journal.pone.0262999. PMID: 35143506; PMCID: PMC8830684.
- 388 27. Nguyen SM, Tran HTT, Tran BQ, Van Hoang M, Truong BD, Nguyen LT, et al.  
389 Compliance to dietary guidelines on fruit and vegetable intake and prevalence of

- 390 hypertension among Vietnamese adults, 2015. *Eur J Prev Cardiol.* 2020 Jan;27(1):39-  
391 46. doi: 10.1177/2047487319867500. Epub 2019 Aug 5. PMID: 31382808; PMCID:  
392 PMC6920565.
- 393 28. Ong SK, Lai DTC, Wong JYY, Si-Ramlee KA, Razak LA, Kassim N, et al. Cross-sectional  
394 STEPwise Approach to Surveillance (STEPS) Population Survey of Noncommunicable  
395 Diseases (NCDs) and Risk Factors in Brunei Darussalam 2016. *Asia Pac J Public Health.*  
396 2017 Nov;29(8):635-648. doi: 10.1177/1010539517738072. Epub 2017 Oct 30. PMID:  
397 29082745.
- 398 29. Wang Y, Beydoun MA, Min J, Xue H, Kaminsky LA, Cheskin LJ. Has the prevalence of  
399 overweight, obesity and central obesity levelled off in the United States? Trends,  
400 patterns, disparities, and future projections for the obesity epidemic. *Int J Epidemiol.*  
401 2020 Jun 1;49(3):810-823. doi: 10.1093/ije/dyz273. PMID: 32016289; PMCID:  
402 PMC7394965.
- 403 30. Ameye H, Swinnen J. Obesity, income and gender: the changing global relationship.  
404 *Global Food Security.* 2019 Dec 1;23:267-81.
- 405 31. Garawi F, Devries K, Thorogood N, Uauy R. Global differences between women and  
406 men in the prevalence of obesity: is there an association with gender inequality? *Eur*  
407 *J Clin Nutr.* 2014 Oct;68(10):1101-6. doi: 10.1038/ejcn.2014.86. Epub 2014 Jun 11.  
408 PMID: 24918120.
- 409 32. Silvestris E, de Pergola G, Rosania R, Loverro G. Obesity as disruptor of the female  
410 fertility. *Reprod Biol Endocrinol.* 2018 Mar 9;16(1):22. doi: 10.1186/s12958-018-0336-  
411 z. PMID: 29523133; PMCID: PMC5845358.

- 412 33. Glenn T, Harris AL, Lindheim SR. Impact of obesity on male and female reproductive  
413 outcomes. *Curr Opin Obstet Gynecol*. 2019 Aug;31(4):201-206. doi:  
414 10.1097/GCO.0000000000000549. PMID: 31022079.
- 415 34. Chowdhury MAB, Adnan MM, Hassan MZ. Trends, prevalence and risk factors of  
416 overweight and obesity among women of reproductive age in Bangladesh: a pooled  
417 analysis of five national cross-sectional surveys. *BMJ Open*. 2018 Jul 19;8(7):e018468.  
418 doi: 10.1136/bmjopen-2017-018468. PMID: 30030307; PMCID: PMC6059314.
- 419 35. Poobalan A, Aucott L. Obesity Among Young Adults in Developing Countries: A  
420 Systematic Overview. *Curr Obes Rep*. 2016 Mar;5(1):2-13. doi: 10.1007/s13679-016-  
421 0187-x. PMID: 26883372; PMCID: PMC4796326.
- 422 36. Lim KG. A Review of Adult Obesity Research in Malaysia. *Med J Malaysia*. 2016  
423 Jun;71(Suppl 1):1-19. PMID: 27801384.
- 424 37. Park SH, Nicolaou M, Dickens BSL, Yang Q, Tan KW, van Dam RM. Ethnicity,  
425 Neighborhood and Individual Socioeconomic Status, and Obesity: The Singapore  
426 Multiethnic Cohort. *Obesity (Silver Spring)*. 2020 Dec;28(12):2405-2413. doi:  
427 10.1002/oby.22995. Epub 2020 Oct 16. PMID: 33064936.
- 428 38. Shyam S, Khor GL, Ambak R, Mahadir B, Hasnan M, Ambu S, et al. Association between  
429 dietary patterns and overweight risk among Malaysian adults: evidence from  
430 nationally representative surveys. *Public Health Nutr*. 2020 Feb;23(2):319-328. doi:  
431 10.1017/S1368980019001861. Epub 2019 Aug 9. PMID: 31397262.
- 432 39. Liu J, Garstka MA, Chai Z, Chen Y, Lipkova V, Cooper ME, Mokoena KK, et al. Marriage  
433 contributes to higher obesity risk in China: findings from the China Health and  
434 Nutrition Survey. *Ann Transl Med*. 2021 Apr;9(7):564. doi: 10.21037/atm-20-4550.  
435 PMID: 33987262; PMCID: PMC8105842.

- 436 40. Cobb LK, McAdams-DeMarco MA, Gudzone KA, Anderson CA, Demerath E, Woodward  
437 M, et al. Changes in Body Mass Index and Obesity Risk in Married Couples Over 25  
438 Years: The ARIC Cohort Study. *Am J Epidemiol.* 2016 Mar 1;183(5):435-43. doi:  
439 10.1093/aje/kwv112. Epub 2015 Sep 23. PMID: 26405117; PMCID: PMC4772434.
- 440 41. Michou M, Panagiotakos DB, Costarelli V. Low health literacy and excess body weight:  
441 a systematic review. *Cent Eur J Public Health.* 2018 Sep;26(3):234-241. doi:  
442 10.21101/cejph.a5172. PMID: 30419628.
- 443 42. Cheng YL, Shu JH, Hsu HC, Liang Y, Chou RH, Hsu PF, et al. High health literacy is  
444 associated with less obesity and lower Framingham risk score: Sub-study of the VGH-  
445 HEALTHCARE trial. *PLoS One.* 2018 Mar 28;13(3):e0194813. doi:  
446 10.1371/journal.pone.0194813. PMID: 29590183; PMCID: PMC5874050.
- 447 43. Lovrić B, Placento H, Farčić N, Lipič Baligač M, Mikšić Š, Mamić M, et al. Association  
448 between Health Literacy and Prevalence of Obesity, Arterial Hypertension, and  
449 Diabetes Mellitus. *Int J Environ Res Public Health.* 2022 Jul 24;19(15):9002. doi:  
450 10.3390/ijerph19159002. PMID: 35897372; PMCID: PMC9331373.
- 451 44. Global Burden of Metabolic Risk Factors for Chronic Diseases Collaboration (BMI  
452 Mediated Effects). Metabolic mediators of the effects of body-mass index, overweight,  
453 and obesity on coronary heart disease and stroke: a pooled analysis of 97 prospective  
454 cohorts with 1·8 million participants. *Lancet.* 2014 Mar 15;383(9921):970-83. doi:  
455 10.1016/S0140-6736(13)61836-X. Epub 2013 Nov 22. PMID: 24269108; PMCID:  
456 PMC3959199.
- 457 45. GBD 2015 Obesity Collaborators. Health Effects of Overweight and Obesity in 195  
458 Countries over 25 Years. *N Engl J Med.* 2017 Jul 6;377(1):13-27. doi:  
459 10.1056/NEJMoa1614362. Epub 2017 Jun 12. PMID: 28604169; PMCID: PMC5477817.

- 460 46. Wang Y, Zhao L, Gao L, Pan A, Xue H. Health policy and public health implications of  
461 obesity in China. *Lancet Diabetes Endocrinol.* 2021 Jul;9(7):446-461. doi:  
462 10.1016/S2213-8587(21)00118-2. Epub 2021 Jun 4. PMID: 34097869.
- 463 47. Tiwari A, Balasundaram P. Public Health Considerations Regarding Obesity. 2022 Sep  
464 3. In: StatPearls [Internet]. Treasure Island (FL): StatPearls Publishing; 2022 Jan–. PMID:  
465 34283488.
